# Supplementary material for: Wearable Pressure Sensor Using Porous Natural Polymer Hydrogel Elastomers with High Sensitivity over a Wide Sensing Range
Source: MDPI journal article supplement (doi:10.3390/polym15122736), 2023-06-19
Supplement: s1 [file s1]

## Supporting Information

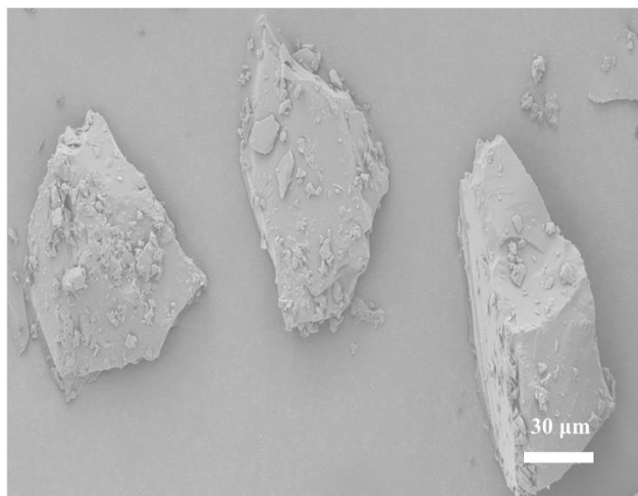

**Figure S1** SEM image of the commercial rosin particles.

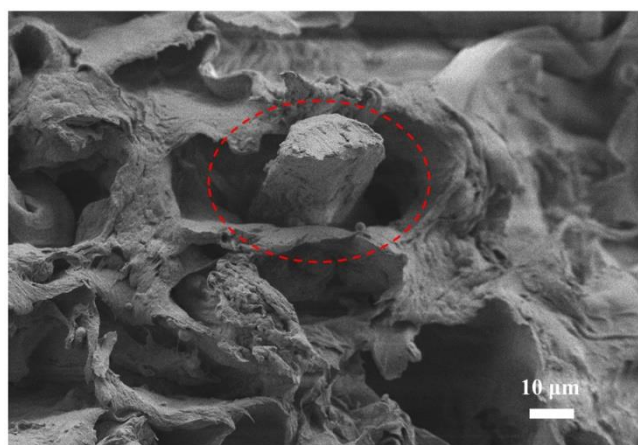

**Figure S2** Cross-sectional SEM image of hydrogel C.

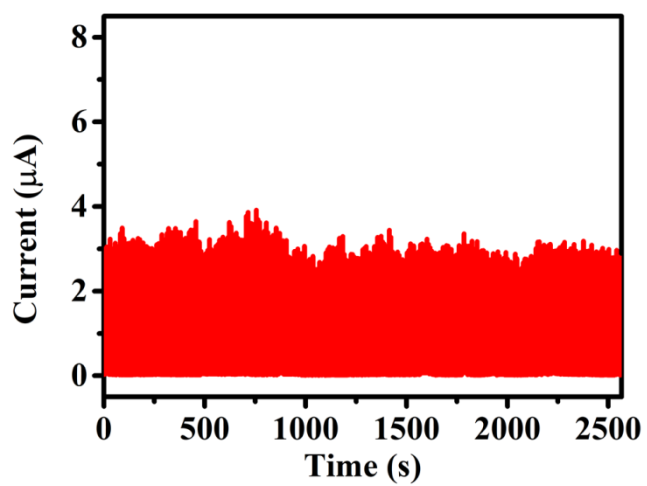

**Figure S3** Stability of the sensor with hydrogel B at 20 kPa for 500 cycles.

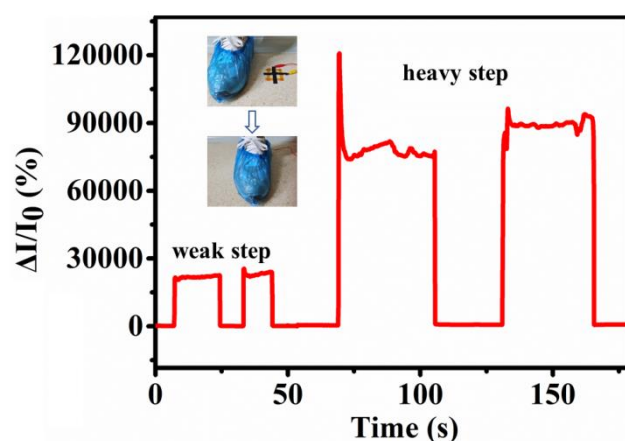

**Figure S4.** Pressure signals when a foot steps on and steps off.

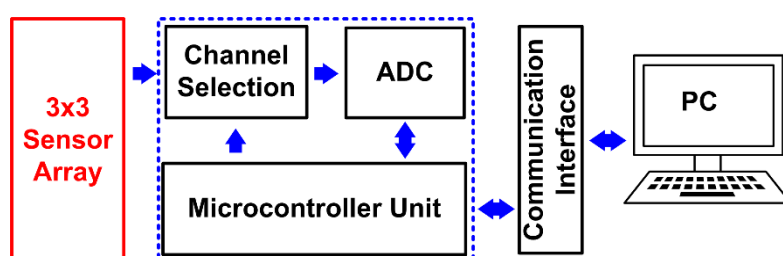

**Figure S5.** A schematic diagram of a sensor array with a signal management circuit system.

**Table S1.** Response time, detection limit, and durability of our sensor in comparison with other piezoresistive sensors based on hydrogels as reported in references.

|                                                                      | Response time | Detection limit | Durability   |
|----------------------------------------------------------------------|---------------|-----------------|--------------|
| This work                                                            | 263 ms        | 100 Pa          | 500 cycles   |
| LBG-based hydrogels with double-rough surface <sup>1</sup>           | 356 ms        |                 | 1000 cycles  |
| MXene-composited PVA/polyvinyl pyrrolidone hydrogel <sup>2</sup>     | 33.5 ms       | 0.87 Pa         | 380 cycles   |
| Gold-nanowire/polyacrylamide composite hydrogels <sup>3</sup>        | 0.5 s         | 0.2 Pa          | 10000 cycles |
| PVA-polyacrylamide hydrogel <sup>4</sup>                             | 150 ms        |                 | 500 cycles   |
| CNTs/hydrophobically associated polyacrylamide hydrogel <sup>5</sup> | 0.6 s         |                 | 300 cycles   |

|                                                                       |         |        |              |
|-----------------------------------------------------------------------|---------|--------|--------------|
| TEMPO-oxidized cellulose nanofibril/polypyrrole hydrogel <sup>6</sup> | < 10 ms | 0.3 Pa | >9000 cycles |
|-----------------------------------------------------------------------|---------|--------|--------------|

## References

1. Huang, Y.; Liu, B.; Zhang, W.; Qu, G.; Jin, S.; Li, X.; Nie, Z.; Zhou, H. Highly Sensitive Active-powering Pressure Sensor Enabled by Integration of Double-rough Surface Hydrogel and Flexible Batteries. *npj Flexible Electronics* **2022**, *6*, 92.
2. Lu, Y.; Qu, X.; Zhao, W.; Ren, Y.; Si, W.; Wang, W.; Wang, Q.; Huang, W.; Dong, X. Highly Stretchable, Elastic, and Sensitive MXene-based Hydrogel for Flexible Strain and Pressure Sensors. *Research* **2020**, *1*, 2038560.
3. Yin, M.; Zhang, Y.; Yin, Z.; Zheng, Q.; Zhang, A. P. Micropatterned Elastic Gold-nanowire/polyacrylamide Composite Hydrogels for Wearable Pressure Sensors. *Adv. Mater. Technol.* **2018**, *3*, 1800051.
4. Ge, G.; Zhang, Y.; Shao, J.; Wang, W.; Si, W.; Huang, W.; Dong, X. Stretchable, Transparent, and Self-patterned Hydrogel-based Pressure Sensor for Human Motions Detection. *Adv. Funct. Mater.* **2018**, *28*, 1802576.
5. Qin, Z.; Sun, X.; Yu, Q.; Zhang, H.; Wu, X.; Yao, M.; Liu, W.; Yao, F.; Li, J. Carbon Nanotubes/Hydrophobically Associated Hydrogels as Ultrastretchable, Highly Sensitive, Stable Strain, and Pressure Sensors. *ACS Appl. Mater. Interfaces* **2020**, *12*, 4944-4953.
6. Gao, Y.; Liu, D.; Xie, Y.; Song, Y.; Zhu, E.; Shi, Z.; Yang, Q.; Xiong, C. Flexible and Sensitive Piezoresistive Electronic Skin Based on TOCN/PPy Hydrogel Films. *J Appl Polym Sci.* **2021**, *138*, 51367.
